# Supplementary material for: Trends in suicide mortality among cancer survivors in the US, 1975-2020
Source: Aging (Albany NY). 2024 Jan 22;16(2):1685–95. doi: 10.18632/aging.205451 (PMC10866445; doi:10.18632/aging.205451)
Supplement: Supplementary Figure 1 [file aging-16-205451-s001.pdf]

## SUPPLEMENTARY FIGURE

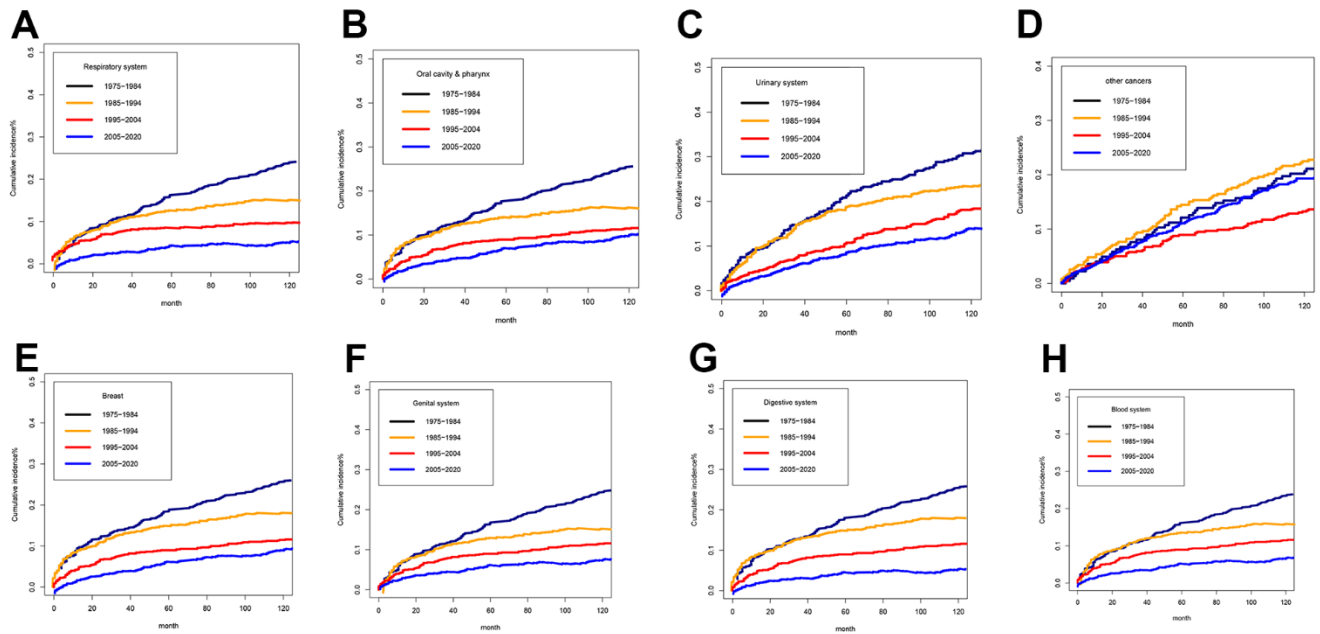

**Supplementary Figure 1.** Cumulative mortality for suicide among eight system cancer survivors (A) Respiratory system, (B) Oral cavity and pharynx, (C) Urinary system, (D) Other cancer, (E) Breast, (F) Genital system, (G) Digestive system, (H) Blood system by year of diagnosis.
