# Supplementary material for: Trends in suicide mortality among cancer survivors in the US, 1975-2020
Source: publisher site journal article supplement (doi:10.18632/aging.205451), 2024-01-22
Supplement: Supplementary file [file aging-v16i2-205451-supplementary-material-SD2.pdf]

## SUPPLEMENTARY TABLE

Supplementary Table 1. Eight categories of cancers and the list of cancers included in each category.

| Oral cavity and pharynx   | Tongue, mouth, pharynx, other oral cavity                                                                                                                                                 |
|---------------------------|-------------------------------------------------------------------------------------------------------------------------------------------------------------------------------------------|
| <b>Digestive system</b>   | Esophagus, Stomach, Small intestine, Colon, Rectum, Anus, anal canal, and anorectum, Liver and intrahepatic bile duct, Gallbladder and other biliary, Pancreas, Other digestive organs    |
| <b>Respiratory system</b> | Larynx, Lung and bronchus, Other respiratory organs                                                                                                                                       |
| <b>Breast</b>             | Breast                                                                                                                                                                                    |
| <b>Genital system</b>     | Uterine cervix, Uterine corpus, Ovary, Vulva, Vagina and other genital, female, Prostate, Testis, Penis and other genital, male,                                                          |
| <b>Blood system</b>       | Lymphoma, Myeloma, Leukemia,                                                                                                                                                              |
| <b>Urinary system</b>     |                                                                                                                                                                                           |
| <b>Other cancer</b>       | Bones and joints, Soft tissue (including heart), Skin (excluding basal and squamous), Eye and orbit Brain and other nervous system, Endocrine system, Other and unspecified primary site. |
